# Supplementary material for: Identification of a missense variant in SPDL1 associated with idiopathic pulmonary fibrosis
Source: PubMed Central journal article supplement (PMC7988141; doi:10.1038/s42003-021-01910-y), 2021-03-23
Supplement: 42003_2021_1910_MOESM3_ESM.pdf [file 42003_2021_1910_MOESM3_ESM.pdf]

## Description of Additional Supplementary Files

**File name:** Supplementary Data 1

**Description:** ExWAS summary statistics.

**File name:** Supplementary Data 2

**Description:** Summary statistics for gene-based collapsing analyses.

**File name:** Supplementary Data 3

**Description:** Summary statistics for combined gene-based collapsing analyses.

**File name:** Supplementary Data 4

**Description:** *MUC5B* allele frequencies in carriers of the *SPDL1* variant, carriers of QVs in telomerase pathway genes, all other IPF cases, and Non-Finnish Europeans in gnomAD.

**File name:** Supplementary Data 5

**Description:** TelSeq-inferred telomerase lengths for PROFILE participants.

**File name:** Supplementary Data 6

**Description:** Differential gene expression data.

**File name:** Supplementary Data 7

**Description:** Putatively Pathogenic *RTEL1*, *PARN*, *TERC* and *TERT* variants.
